# Supplementary material
Source: HighWire-hosted journal article supplement (https://www.cmaj.ca/highwire/filestream/148246/field_highwire_adjunct_files/0/220584-image-1-at.pdf)
Supplement: 220584-image-1-at.pdf [file 220584-image-1-at.pdf]

1 **Appendix 1**

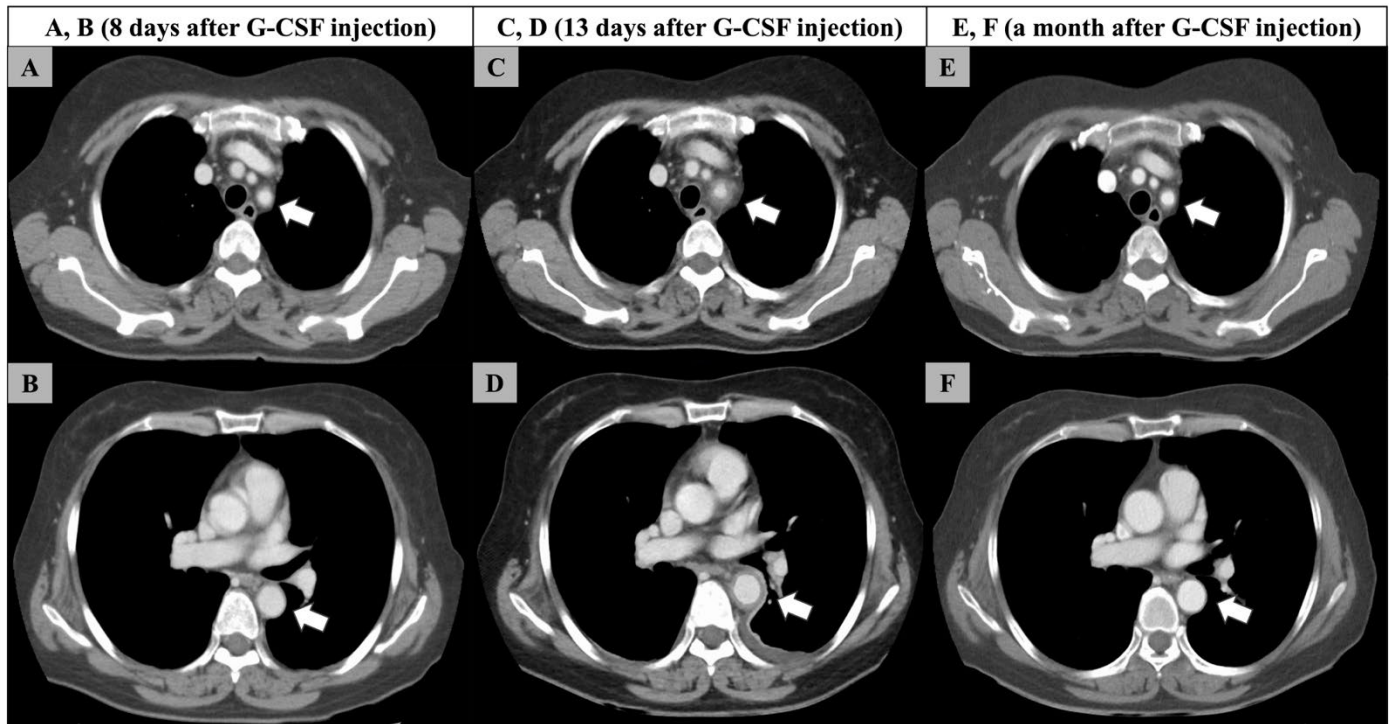

2

3 **Appendix Figure Caption**

4 (A, B) The aortic wall was within normal limits on a contrast-enhanced computed tomography scan performed on day  
5 8 after granulocyte colony-stimulating factor administration. (C, D) There was marked circumferential wall thickness  
6 in the left subclavian artery and descending thoracic aorta on a contrast-enhanced computed tomography scan 5 days  
7 later. There was left-sided pleural effusion probably due to aortic inflammation. (E, F) The wall thickness of the vessels  
8 had returned to normal a month later.
